# Supplementary material for: Nitric Oxide Down-Regulates Topoisomerase I and Induces Camptothecin Resistance in Human Breast MCF-7 Tumor Cells
Source: PubMed Central journal article supplement (PMC4635000; doi:10.1371/journal.pone.0141897), 2015-11-05
Supplement: pone.0141897.s004.pdf [file pone.0141897.s004.pdf]

S1 Table.

| Start Amino Acid          | Sequence                                               | Measured (m/z) | Corresponding M+H | Theoretical M+H | Delta mass (Da) |
|---------------------------|--------------------------------------------------------|----------------|-------------------|-----------------|-----------------|
| Unmodified TOPO1          |                                                        |                |                   |                 |                 |
| 219                       | (K)FLEHKGPVFAPPYEPLPENVK(F)                            | 603.5          | 2411              | 2408.3          | 2.7             |
| 219                       | (K)FLEHKGPVFAPPYEPLPENVKFYDYGKVMK(L)                   | 591.2          | 3542.2            | 3539.8          | 2.4             |
| 249                       | (K)LSPKAEVATFFAK(M)                                    | 769.7          | 1538.4            | 1537.8          | 0.6             |
| 253                       | (K)AEVATFFAK(M)                                        | 556.7          | 1112.4            | 1112.6          | -0.2            |
| 337                       | (K)EYGFICIMDNHKER(I)                                   | 411.2          | 1641.8            | 1641.7          | 0.1             |
| 341                       | (F)CIMDNHKERIANFKIEPPGL(F) Unmodified (C)              | 466.1          | 2326.5            | 2325.2          | 1.3             |
| 350                       | (R)IANFKIEPPGLFRGR(G)                                  | 573.1          | 1717.3            | 1715            | 2.3             |
| 350                       | (R)IANFKIEPPGLF(R)                                     | 673.2          | 1345.4            | 1345.8          | -0.3            |
| 377                       | (R)IMPEDIIINCSK(D) Unmodified (C)                      | 688.2          | 1375.1            | 1375.7          | -0.6            |
| 377                       | (R)IMPEDIIINCSKDAK(V) Unmodified (C)                   | 563.8          | 1689.4            | 1689.9          | -0.5            |
| 476                       | (R)AVALYFIDKLALRAGNEKEEGETADTVGCCSLR(V) Unmodified (C) | 591.2          | 3542.2            | 3542.8          | -0.9            |
| 593                       | (Y)NASITLQQQLKELTAPDENIPAK(I)                          | 841.8          | 2523.4            | 2522.4          | 1               |
| 639                       | (K)TFEKSMMLNLTQK(I)                                    | 486.6          | 1457.8            | 1457.7          | 0.1             |
| 728                       | (R)ITVAWCCKKVGPIEK(I)                                  | 586.9          | 1758.7            | 1758            | 0.7             |
| 736                       | (K)WGVPIEKIYNKTQR(E)                                   | 577.9          | 1731.7            | 1732            | -0.4            |
| 736                       | (K)WGVPIEKIYNK(T)                                      | 449.8          | 1347.4            | 1346.7          | 0.6             |
|                           |                                                        |                |                   |                 |                 |
| Carbamidomethylated TOPO1 |                                                        |                |                   |                 |                 |
| 131                       | (K)EDIKPLK(R)                                          | 842.509        |                   | 842.498         | 0.01            |
| 138                       | (K)RPRDEDDADYKPK(K)                                    | 1604.742       |                   | 1604.766        | -0.024          |
| 205                       | (K)WWEERYPEGIKWK(F)                                    | 1935.925       |                   | 1935.939        | -0.014          |
| 224                       | (K)GPVFAPPYEPLPENVK(F)                                 | 1753.901       |                   | 1753.916        | -0.015          |
| 253                       | (K)AEVATFFAK(M)                                        | 1112.56        |                   | 1112.562        | -0.003          |
| 277                       | (K)NFFKDWR(K)                                          | 1012.501       |                   | 1012.500        | 0.001           |
| 292                       | (K)NIITNLSKCDFTQMSQYFK(A) Unmodified (C)               | 2297.183       |                   | 2297.094        | 0.089           |

|     |                                                  |          |  |          |        |
|-----|--------------------------------------------------|----------|--|----------|--------|
| 300 | (K)CDFTQMSQYFKAQTEARK(Q) Carbamidomethyl (C)     | 2239.115 |  | 2239.027 | 0.088  |
| 355 | (K)IEPPGLFR(G)                                   | 928.525  |  | 928.525  | 0.0001 |
| 376 | (R)RIMPEDIIINCSK(D) Unmodified (C)               | 1531.791 |  | 1531.797 | -0.007 |
| 410 | (K)VTWLVSWTENIQGSIK(Y)                           | 1860.97  |  | 1860.985 | -0.016 |
| 426 | (K)YIMLNPSSR(I)                                  | 1080.545 |  | 1080.551 | -0.006 |
| 459 | (R)NQYREDWK(S)                                   | 1138.526 |  | 1138.528 | -0.002 |
| 489 | (R)AGNEKEEGETADTVGCCSLR(V) 2 Carbamidomethyl (C) | 2182.93  |  | 2182.934 | -0.004 |
| 509 | (R)VEHINLHPELDGQEYVVEFDLFGK(D)                   | 2827.394 |  | 2827.394 | 0      |
| 550 | (K)NLQLFMENKQPEDDLFDR(L)                         | 2252.06  |  | 2252.065 | -0.005 |
| 559 | (K)QPEDDLFDR(L)                                  | 1134.502 |  | 1134.506 | -0.004 |
| 559 | (K)QPEDDLFDRLNTGILNK(H)                          | 1987.995 |  | 1988.008 | -0.013 |
| 568 | (R)LNTGILNKHLQDLMEGLTAK(V)                       | 2225.105 |  | 2225.196 | -0.091 |
| 576 | (K)HLQDLMEGLTAK(V)                               | 1355.686 |  | 1355.699 | -0.013 |
| 591 | (R)TYNASITLQQQLK(E)                              | 1507.8   |  | 1507.812 | -0.011 |
| 625 | (R)AVAILCNHQR(A) Carbamidomethyl (C)             | 1181.614 |  | 1181.621 | -0.007 |
| 651 | (K)LEVQATDREENK(Q)                               | 1431.698 |  | 1431.707 | -0.009 |
| 671 | (K)LNYLDPR(I)                                    | 890.468  |  | 890.473  | -0.005 |
| 686 | (K)WGVPIEK(I)                                    | 828.457  |  | 828.461  | -0.004 |
